# Supplementary material for: Inhibition of CK1ε potentiates the therapeutic efficacy of CDK4/6 inhibitor in breast cancer
Source: PubMed Central journal article supplement (PMC8433397; doi:10.1038/s41467-021-25700-6), 2021-09-10
Supplement: 41467_2021_25700_MOESM1_ESM.pdf [file 41467_2021_25700_MOESM1_ESM.pdf]

## Supplementary Information

# Inhibition of CK1 $\epsilon$ potentiates the therapeutic efficacy of CDK4/6 inhibitor in breast cancer

Fabin Dang<sup>1,9</sup>, Li Nie<sup>1,2,9</sup>, Jin Zhou<sup>3,4,9</sup>, Kouhei Shimizu<sup>1</sup>, Chen Chu<sup>5</sup>, Zhong Wu<sup>4,6</sup>, Anne Fassl<sup>5</sup>, Shizhong Ke<sup>7</sup>, Yuangao Wang<sup>8</sup>, Jinfang Zhang<sup>1</sup>, Tao Zhang<sup>1</sup>, Zhenbo Tu<sup>1</sup>, Hiroyuki Inuzuka<sup>1</sup>, Piotr Sicinski<sup>5</sup>, Adam J. Bass<sup>4#</sup>, Wenyi Wei<sup>1#</sup>

1. Department of Pathology, Beth Israel Deaconess Medical Center, Harvard Medical School, Boston, MA, USA
2. State Key Laboratory for Managing Biotic and Chemical Threats to the Quality and Safety of Agro-products, School of Marine Sciences, Ningbo University, Ningbo, China
3. Department of Liver Surgery & Liver Transplantation, State Key Laboratory of Biotherapy and Cancer Center, West China Hospital, Sichuan University, Chengdu, China.
4. Department of Medical Oncology, Dana-Farber Cancer Institute, Harvard Medical School, Boston, MA, USA.
5. Department of Cancer Biology, Dana-Farber Cancer Institute and Department of Genetics, Blavatnik Institute, Harvard Medical School, Boston, MA, USA.
6. Department of Pancreatic Surgery, West China Hospital, Sichuan University, Chengdu, China.
7. Division of Hematology/Oncology, Department of Medicine, Beth Israel Deaconess Medical Center, Harvard Medical School, Boston, MA, USA
8. Program in Cellular and Molecular Medicine, Boston Children's Hospital, Boston, MA, USA.
9. These authors contributed equally to this work.

### # Correspondence

A. B.: adam\_bass@dfci.harvard.edu; 450 Brookline Ave, Boston, MA 02215

W.W.: wwei2@bidmc.harvard.edu; E/CLS-637, 3 Blackfan Circle, Boston, MA 02215

# Sup. Fig 1

**a**

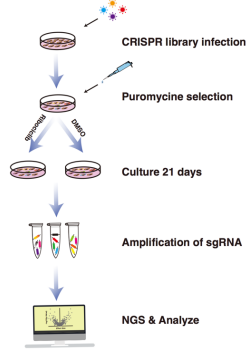

**b**

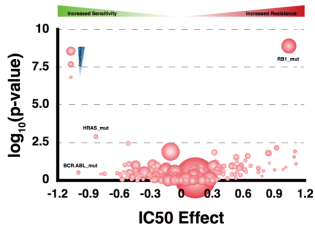

**c**

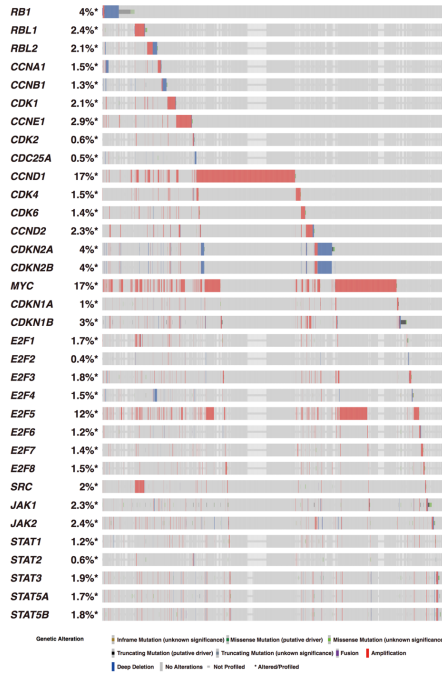

**d**

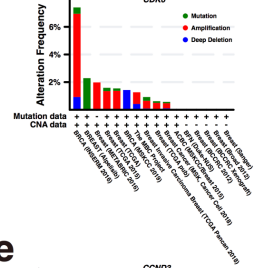

**e**

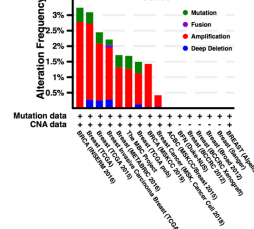

**f**

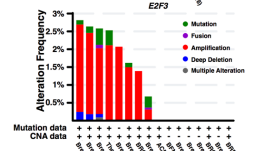

**g**

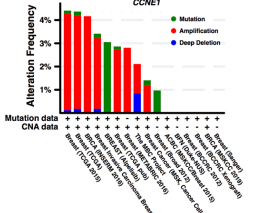

**j**

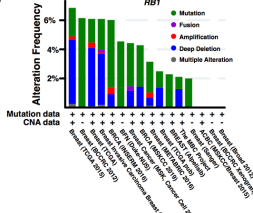

**m**

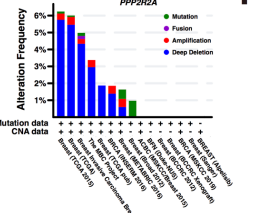

**p**

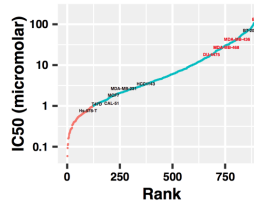

**h**

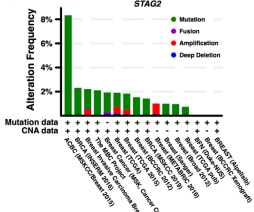

**k**

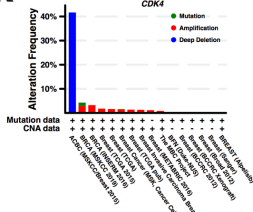

**n**

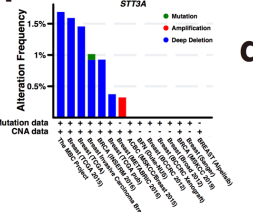

**q**

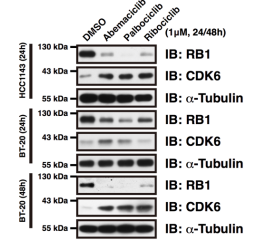

**i**

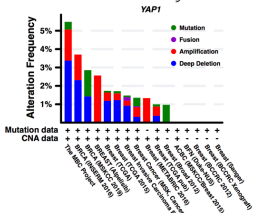

**l**

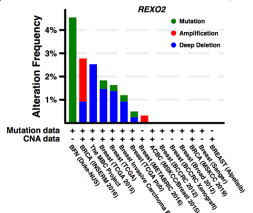

**o**

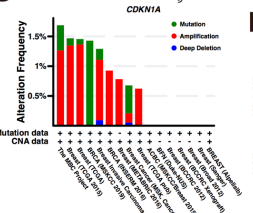

**r**

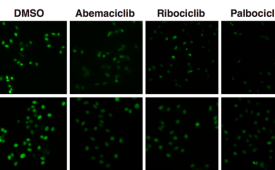

**Supplementary Fig. 1. Genomic alterations in the cell cycle pathway in breast cancer.**

(a) Workflow of the pooled CRISPR genetic screening strategy. (b) Genomic alteration and cellular response to palbociclib. Data was achieved from Genomics of Drug Sensitivity in Cancer database (<https://www.cancerrxgene.org>). (c) The type and frequency of genomic alterations in the cell cycle control genes in breast cancer. Data were obtained from the cBioPortal database. (d-i) Genomic mutation types and frequency of cell cycle genes whose amplification drive CDK4/6i resistance identified by the CRISPR screen. Data were obtained from the cBioPortal for Cancer Genomics database (<https://www.cbioportal.org>). (j-o) Genomic mutation types and frequency of cell cycle genes whose depletion drive CDK4/6i resistance identified by the CRISPR screen. Data were obtained from the cBioPortal database. (p) IC50 of cancer cell lines in response to palbociclib treatment. Data was achieved from Genomics of Drug Sensitivity in Cancer database (<https://www.cancerrxgene.org>). (q) Immunoblot showing the RB1 and CDK6 protein abundance in the context of CDK4/6i treatment in HCC1143 and BT-20 breast cancer cell lines. (r) Immunostaining showing decreased RB1 protein abundance in MCF7 and MDA-MB-231 breast cancer cells upon CDK4/6i treatment. Scale bar: 100  $\mu$ M. The relevant raw data and uncropped blots are provided in Source Data.

# Sup. Fig 2

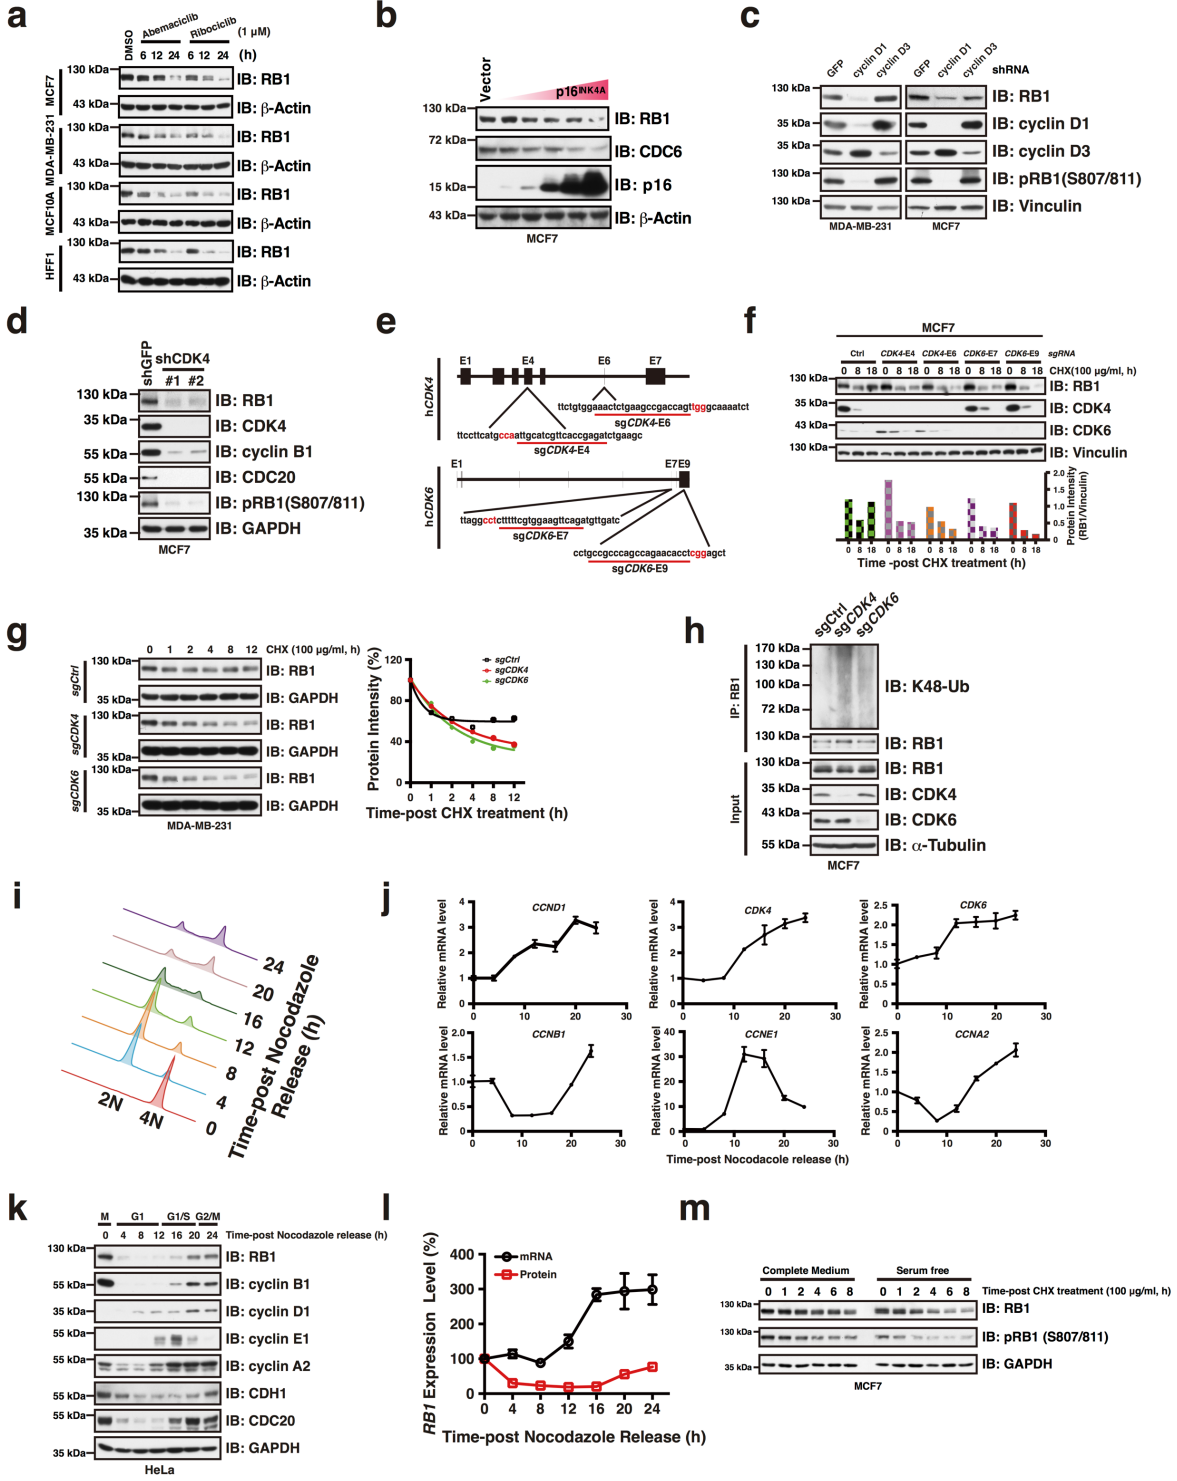



**Supplementary Fig. 2. Suppression of cyclin D1-CDK4 promotes RB1 degradation.**

(a) Exposure of cells with CDK4/6i reduced RB1 protein abundance in a time-dependent manner in multiple breast cancer cell lines. (b) Ectopic expression of p16<sup>INK4A</sup> reduced RB1 protein levels in a dose-dependent manner in MCF7 cells. (c) Knocking-down of *cyclin D1* resulted in RB1 protein reduction in MCF7 and MDA-MB-231 breast cancer cells. (d) Knocking-down of *CDK4* led to RB1 protein reduction in MCF7 cells. (e) A schematic diagram of sgRNAs targeting the human *CDK4* and *CDK6* loci. (f) Knocking-out of *CDK4/6* accelerated RB1 protein degradation in MCF7 cells. (g) Knocking-out of *CDK4/6* accelerated RB1 degradation in MDA-MB-231 cells. (h) Knocking-out of *CDK4/6* resulted in accumulation of K48-linked polyubiquitination of RB1. (i) HeLa cells were treated with nocodazole (10  $\mu$ M) for 16 hours and suspended cells were harvested and washed three times with PBS before seeding. Cells were then harvested at indicated time, and Fluorescence-activated cell sorting (FACS) analysis was performed to show cell distribution in different cell cycle phases. (j) RT-qPCR analysis showing the transcriptional pattern of cell cycle genes throughout the cell cycle progression (n=3). (k) Immunoblot showing that RB1 protein abundance fluctuates throughout the cell cycle. (l) Quantification of RB1 protein intensity and mRNA levels throughout the cell cycle (n=3). (m) CHX chase assay showing the destruction of RB1 was accelerated in the context of serum starvation in MCF7 cells. Data are presented as mean values +/- SEM. The relevant raw data and uncropped blots are provided in Source Data.

# Sup. Fig 3

**a**

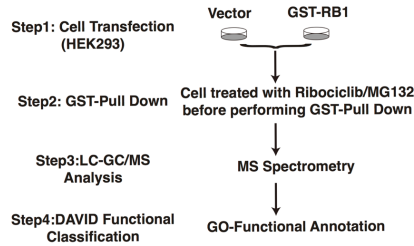

**b**

| Protein | # Peptides |
|---------|------------|
| RB1     | 1230       |
| UBB     | 71         |
| E2F4    | 27         |
| TFDP1   | 26         |
| CDK1    | 12         |
| E2F5    | 10         |
| E2F3    | 7          |
| CDK2    | 7          |
| CCNB1   | 5          |
| CCNA2   | 5          |
| CDK4    | 5          |
| CDC20   | 3          |
| CSKN1E  | 3          |
| CUL1    | 2          |
| SKP1    | 2          |

**c**

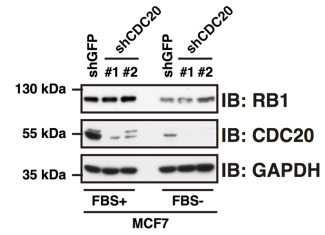

**d**

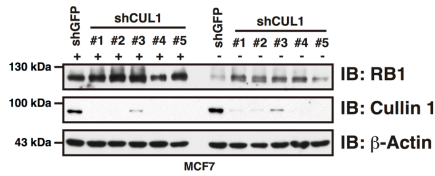

**e**

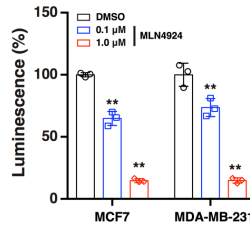

**f**

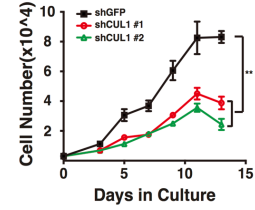

**g**

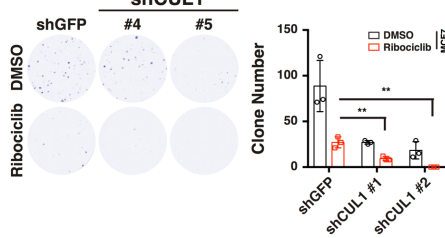

**h**

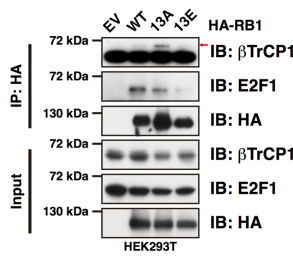

**j**

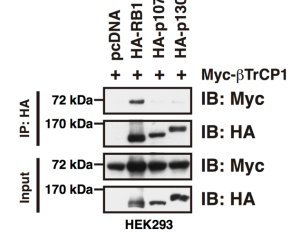

**i**

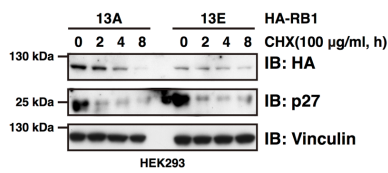

**k**

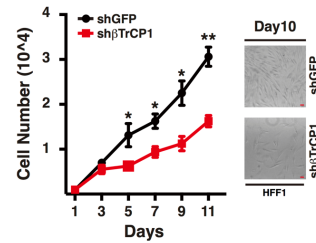

**l**

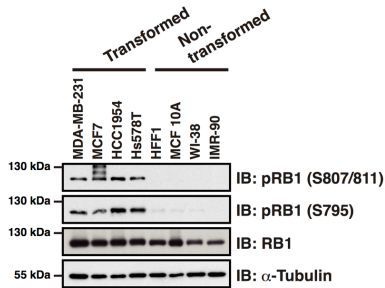

**m**

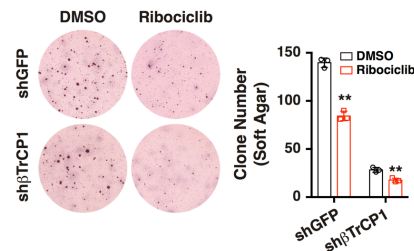

**Supplementary Fig. 3. Cullin 1- $\beta$ TrCP1 mediates hypo-phosphorylated RB1 for proteasomal degradation in G1 phase.**

(a) A schematic view of the workflow of LC-MS analysis. (b) A short list of proteins identified in GST-RB1 precipitates by LC-MS/MS. (c) Knocking-down of *CDC20* did not noticeably affect RB1 protein abundance in MCF7 cells. (d) Knocking-down of *Cullin 1* led to RB1 accumulation in the context of serum starvation. (e) Treatment of MCF7 and MDA-MB-231 cells with MLN4924 suppressed cell viability in a dose-dependent manner (n=3). The *P*-values were calculated by Student's t-test (two-sided). \*\*: *P*<0.01. (f) Knocking-down of *Cullin 1* suppressed cell proliferation (n=4). Statistical differences were assessed by two-way ANOVA (two-sided). \*\*: *P*<0.01. (g) Colony formation assay showing that knocking-down of *Cullin 1* enhanced the inhibitory effect of ribociclib on cell proliferation (n=3). The *P*-values were calculated by Student's t-test (two-sided). \*\*: *P*<0.01. (h) Immunoprecipitation assay showing that the hyper-phosphorylation mimetic RB1-13E mutant was compromised in the RB1- $\beta$ TrCP1 interaction. (i) CHX chase assay showing that the RB1-13E mutant was more stable than the RB1-13A mutant. (j)  $\beta$ TrCP1 specifically interacted with RB1, but not p107 and p130 in cells. (k) Knocking-down of endogenous  *$\beta$ TrCP1* suppressed HFF1 cell proliferation (n=4). Scale bar: 50  $\mu$ M. The *P*-values were calculated by Student's t-test (two-sided). \*: *P*<0.05, \*\*: *P*<0.01. (l) Immunoblot showing that RB1 is hyper-phosphorylated in transformed cancer cells. (m) Soft agar assay showing that knocking-down of  *$\beta$ TrCP1* enhanced the inhibitory effect of ribociclib on MCF7 cell proliferation (n=3). The *P*-values were calculated by Student's t-test (two-sided). \*\*: *P*<0.01. Data are presented as mean values +/- SEM. The relevant raw data and uncropped blots are provided in Source Data.



**Supplementary Fig. 4. CK1 $\epsilon$  is required for  $\beta$ TrCP1-mediated RB1 degradation.**

(a) Ectopic expression of CK1 $\epsilon$  led to reduced RB1 protein abundance. (b) FACS analysis showing the distribution of MDA-MB-231 cells in different cycle phases at indicated time points post serum re-addition, related to Figure 3e. (c) Hyper-phosphorylation mimetic mutant RB1-13E was relatively resistant to CK1 $\epsilon$ / $\beta$ TrCP1-mediated degradation. (d) Exposure of cells with D 4476 reduced cell viability in a dose-dependent manner in MCF7 and MDA-MB-231 cells (n=3). The *P*-values were calculated by Student's t-test (two-sided). \*\*: *P*<0.01. (e) Treatment of HFF1 non-transformed cells with D 4476 suppressed HFF1 cell proliferation (n=4). The *P*-values were calculated by Student's t-test (two-sided). \*\*: *P*<0.01. (f) Treatment of MCF7 cells with D 4476 suppressed MCF7 cell proliferation (n=4). The *P*-values were calculated by Student's t-test (two-sided). \*\*: *P*<0.01. (g) Colony formation assay showing that knocking-down of *CK1 $\epsilon$*  enhanced the inhibitory effect of ribociclib on cell proliferation in MCF7 cells (n=3). The *P*-values were calculated by Student's t-test (two-sided). \*\*: *P*<0.01. Data are presented as mean values +/- SEM. The relevant raw data and uncropped blots are provided in Source Data.

# Sup. Fig 5

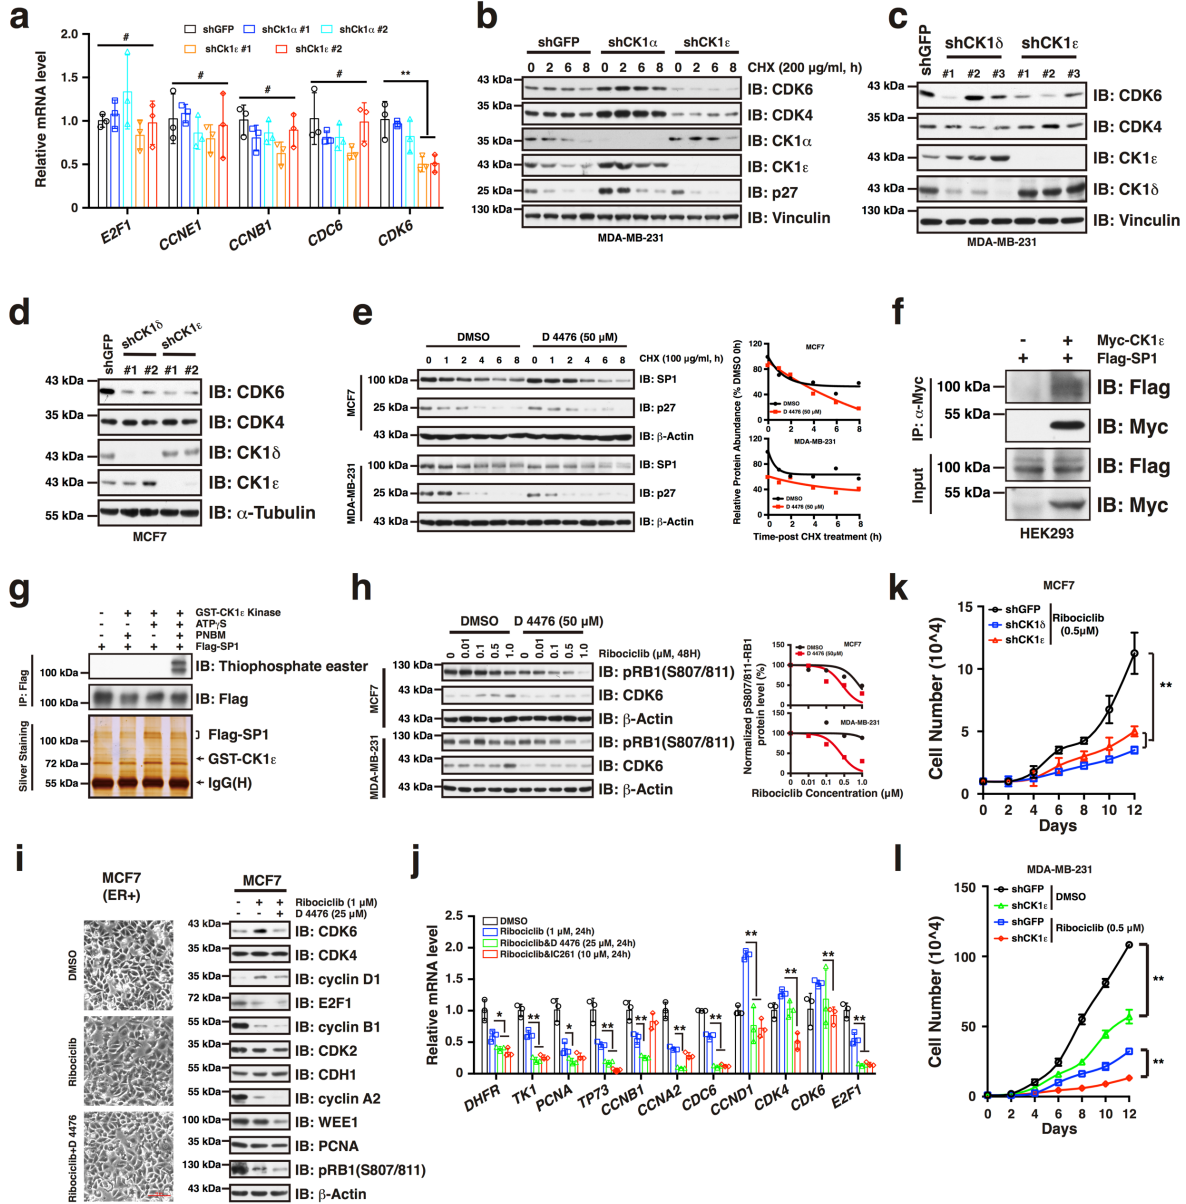

**Supplementary Fig. 5. CK1 $\epsilon$ -SP1 axis modulates CDK6 upregulation in the context of CDK4/6i treatment.**

(a) RT-qPCR analysis showing that knocking-down of *CK1 $\epsilon$*  suppressed *CDK6* transcription (n=3). The *P*-values were calculated by Student's t-test (two-sided). #: no significant difference, \*\*: *P*<0.01. (b) Knocking-down of *CK1 $\epsilon$*  did not affect CDK6 protein stability. (c) Knocking-down of *CK1 $\delta/\epsilon$*  reduced CDK6 protein abundance in MDA-MB-231 cells. (d) Knocking-down of *CK1 $\delta/\epsilon$*  reduced CDK6 protein abundance in MCF7 cells. (e) Treatment of cells with D 4476 promoted SP1 degradation in MCF7 and MDA-MB-231 cells. (f) SP1 physically interacted with CK1 $\epsilon$  in cells. (g) CK1 $\epsilon$  phosphorylated SP1 *in vitro*. (h) Combination of D 4476 sensitized MCF7 and MDA-231 breast cancer cells to ribociclib treatment. (i) Combination of D 4476 with ribociclib prevented CDK6 accumulation and exhibited enhanced suppressive effect on cell cycle gene expression in MCF7 cells. (j) RT-qPCR analysis showing that combination of CDK4/6i (ribociclib) and CK1 $\epsilon$  kinase inhibitor (D 4476 or IC261) abolished ribociclib-induced *CDK6* upregulation and exhibited enhanced inhibitory effect on cell cycle gene transcription in MDA-MB-231 cells (n=3). The *P*-values were calculated by Student's t-test (two-sided). \*: *P*<0.05, \*\*: *P*<0.01. (k) Knocking-down of *CK1 $\epsilon$*  enhanced ribociclib-induced cell proliferation suppression in MCF7 cells (n=4). Statistical differences were assessed by two-way ANOVA (two-sided). \*\*: *P*<0.01. (l) Knocking-down of CK1 $\epsilon$  enhanced ribociclib-induced cell proliferation suppression in MDA-MB-231 cells (n=4). Statistical differences were assessed by two-way ANOVA (two-sided). \*\*: *P*<0.01. Data are presented as mean values +/- SEM. The relevant raw data and uncropped blots are provided in Source Data.

# Sup. Fig 6

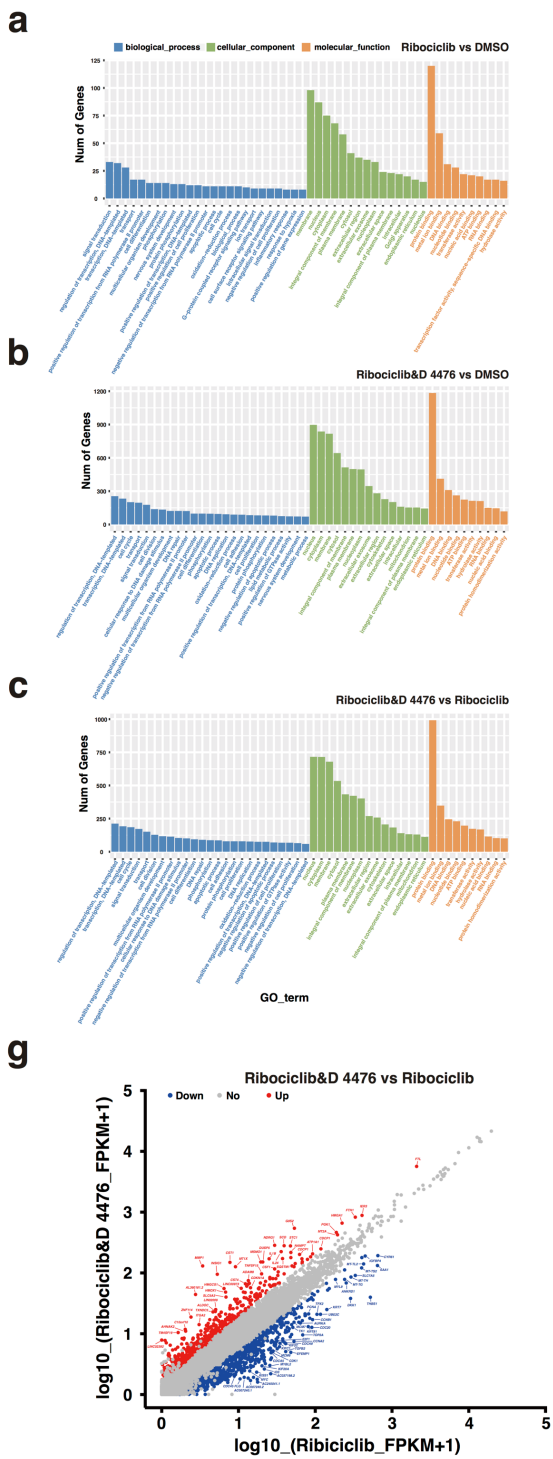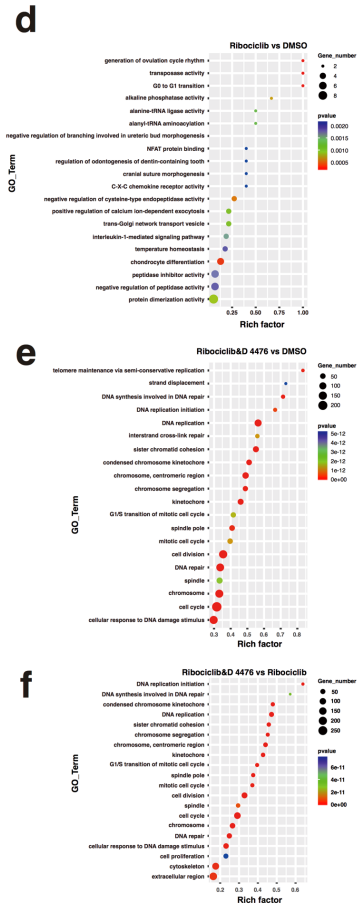



**Supplementary Fig. 6. D 4476 synergizes with ribociclib in breast cancer cells.**

MDA-MB-231 cells were treated with DMSO, ribociclib (1  $\mu$ M) and ribociclib (1  $\mu$ M) & D 4476 (25  $\mu$ M) for 48 hours. Total RNAs were extracted and RNA-sequencing was performed. Gene expression profiles were then analyzed. Each treatment has three replicates. Cluster analysis showing the number of responsible genes involved in different cellular process: **(a)** ribociclib vs DMSO, **(b)** ribociclib & D 4476 vs DMSO, **(c)** ribociclib & D 4476 vs ribociclib. GO analysis showing the enriched cellular process upon drug treatment: **(d)** ribociclib vs DMSO, **(e)** ribociclib & D 4476 vs DMSO, **(f)** ribociclib & D 4476 vs ribociclib. **(g)** Scatter plot showing the up- and down-regulated genes in the ribociclib and D 4476 combination treatment compared to ribociclib single treatment.

# Sup. Fig 7

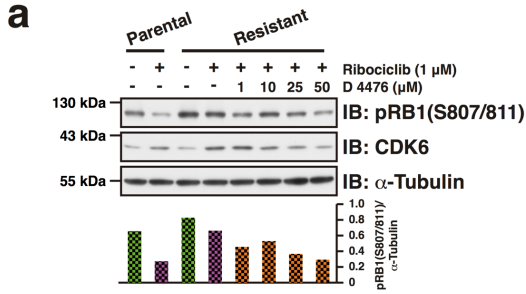

**b**

| Parameter | Male     | Female   | Average      | Unit           |
|-----------|----------|----------|--------------|----------------|
| AUC(0-t)  | 3506.073 | 2642.218 | 3074.1±610.8 | ug/L*h         |
| MRT(0-t)  | 5.859    | 4.012    | 4.9±1.3      | h              |
| VRT(0-t)  | 88.971   | 52.692   | 70.8±25.7    | h <sup>2</sup> |
| t1/2z     | 11.473   | 4.682    | 8.1±4.8      | h              |
| Tmax      | 0.5      | 0.5      | 0.5          | h              |
| Vz/F      | 462.091  | 255.634  | 358.9±146.0  | L/kg           |
| CLz/F     | 27.913   | 37.834   | 32.9±7.0     | L/h/kg         |
| Cmax      | 2370.720 | 1938.420 | 2154.6±305.7 | ug/L           |

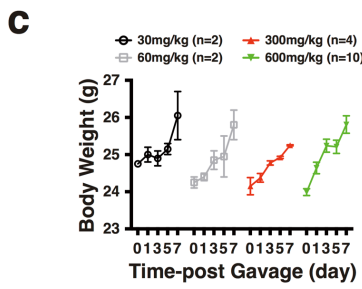

**d**

| Male      | spleen      | liver       | kidney      | thymus      | heart       | testis      | epididymis  |
|-----------|-------------|-------------|-------------|-------------|-------------|-------------|-------------|
| Weight(g) | 0.091±0.009 | 1.317±0.050 | 0.375±0.018 | 0.045±0.007 | 0.121±0.020 | 0.185±0.008 | 0.071±0.008 |
| W-Range   | 0.07-0.12   | 1.0-1.4     | 0.3-0.4     | 0.03-0.08   | 0.09-0.15   | 0.16-0.22   | 0.05-0.08   |
| Factor    | 0.355±0.028 | 5.156±0.128 | 1.467±0.051 | 0.177±0.021 | 0.473±0.074 | 0.726±0.037 | 0.280±0.035 |
| F-Range   | 0.30-0.41   | 4.1-5.5     | 0.8-1.6     | 0.11-0.25   | 0.30-0.58   | 0.50-0.78   | 0.15-0.30   |
| Female    | spleen      | liver       | kidney      | thymus      | heart       | ovary       | uterus      |
| Weight(g) | 0.107±0.014 | 0.863±0.072 | 0.252±0.021 | 0.047±0.005 | 0.092±0.004 | 0.016±0.003 | 0.166±0.062 |
| W-Range   | 0.07-0.12   | 0.7-1.2     | 0.2-0.3     | 0.03-0.07   | 0.08-0.14   | 0.01-0.03   | 0.09-0.32   |
| Factor    | 0.411±0.059 | 3.311±0.320 | 0.968±0.087 | 0.182±0.024 | 0.353±0.017 | 0.062±0.012 | 0.639±0.251 |
| F-Range   | 0.33-0.50   | 2.7-3.9     | 0.9-1.4     | 0.11-0.25   | 0.25-0.50   | 0.04-0.09   | 0.40-1.15   |

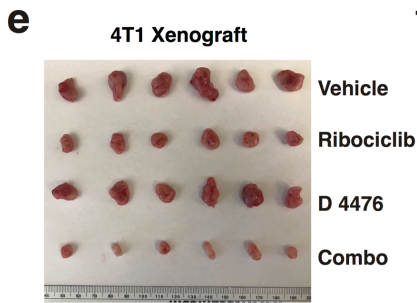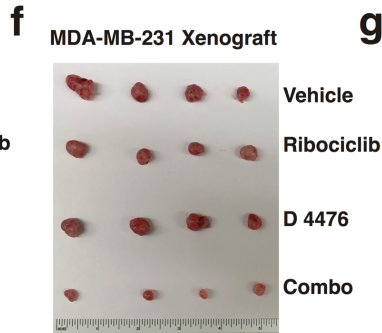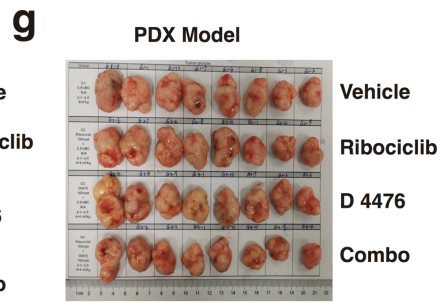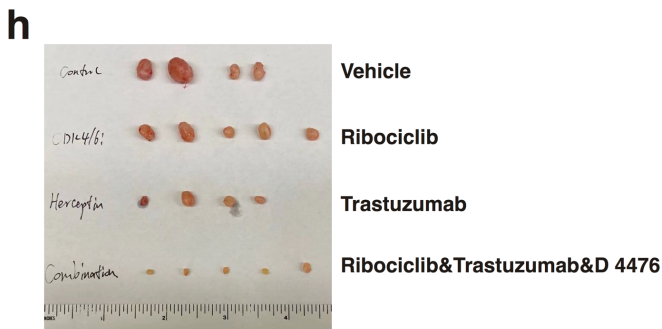

**Supplementary Fig. 7. Pharmacokinetic properties of D 4476 *in vivo*.**

(a) Combination of D 4476 and ribociclib abolished CDK6 upregulation and overcomes CDK4/6i resistance on inhibiting RB1 phosphorylation in MDA-MB-231 cells. (b) A table showing the major pharmacokinetic parameters of D 4476 *in vivo*. (c) Administration of D4476 did not noticeably affect the gain of body weight. Data are presented as mean values +/- SEM. (d) Administration of D4476 had no noticeable effect on organ weight. (e-h) 4T1 xenograft tumors (e), MDA-MB-231 xenograft tumors (f), PDX tumors (g) and BT-474 xenograft tumors (h), treated with indicated therapeutic strategy. The relevant raw data and uncropped blots are provided in Source Data.

| <b>Supplementary Table 1. Primers for gene cloning</b> |                                        |
|--------------------------------------------------------|----------------------------------------|
| Name                                                   | Sequence                               |
| sgControl                                              | CGCTTCCGCGGCCCGTTCAA                   |
| sgRNA- <i>hCDK4</i> -F #1                              | CACCGATCTCGGTGAACGATGCAAT              |
| sgRNA- <i>hCDK4</i> -R #1                              | AAACATTGCATCGTTCACCGAGATC              |
| sgRNA- <i>hCDK4</i> -F #2                              | CACCGAAACTCTGAAGCCGACCAGT              |
| sgRNA- <i>hCDK4</i> -R #2                              | AAACACTGGTCGGCTTCAGAGTTTC              |
| sgRNA- <i>hCDK6</i> -F #1                              | CACCGTCTGAACTTCCACGAAAAAG              |
| sgRNA- <i>hCDK6</i> -R #1                              | AAACCTTTTTCTGTGGAAGTTCAGAC             |
| sgRNA- <i>hCDK6</i> -F #2                              | CACCGCCGCCAGCCAGAACACCT                |
| sgRNA- <i>hCDK6</i> -R #2                              | AAACAGGTGTTCTGGCTGGGCGGC               |
| <i>hCDK6</i> -p1000-F                                  | GCATGGTACCGCTCCTCTGAAATACGTTAGTGAACC   |
| <i>hCDK6</i> -p800-F                                   | GCATGGTACCCAAAACAAATGTAGCTCATGCTG      |
| <i>hCDK6</i> -p600-F                                   | GCATGGTACCGTGTTTTTCCCATCCGTCCAC        |
| <i>hCDK6</i> -p300-F                                   | GCATGGTACCCGCCTCATTTCTCTCCGGAAGGC      |
| <i>hCDK6</i> -p100-F                                   | GCATGGTACCGCGAGCGGCGCGGGCGGCGCC        |
| <i>hCDK6</i> -promoter-R                               | GCATCTCGAGAGACTCTGGGGAAGGAGTTACCAGCAC  |
| <i>hCDK6</i> -dGC box-F                                | CGCCCTCCGCCGTCCCTCCGCC                 |
| <i>hCDK6</i> -dGC box-R                                | GCGCCGCTCGCTGGGGGCGGACG                |
| <i>hRBI</i> -GST-F401                                  | GCATGGATCCCCACACACTCCAGTTAGGAC         |
| <i>hRBI</i> -GST-R401                                  | GCATCTCGAGCTACTGCAAAATATTTGTTTTTCAG    |
| <i>hRBI</i> -S508A/T510A-F                             | CAGAATCTTGATGCCGGAGCCGATTTGTCTTTCCC    |
| <i>hRBI</i> -S508A/T510A-R                             | GGGAAAGACAAATCGGCTCCGGCATCAAGATTCTG    |
| <i>hRBI</i> -S508A/S513A-F                             | CAGAATCTTGATGCCGGAACAGATTTGGCCTTCCCATG |
| <i>hRBI</i> -S508A/S513A-R                             | CATGGGAAGGCCAAATCTGTTCCGGCATCAAGATTCTG |
| <i>hRBI</i> -S508/T510/S513A-F                         | CAGAATCTTGATGCCGGAGCCGATTTGGCCTTCCCATG |
| <i>hRBI</i> -S508/T510/S513A-R                         | CATGGGAAGGCCAAATCGGCTCCGGCATCAAGATTCTG |

| <b>Supplementary Table 2. Real-Time PCR primers</b> |                           |
|-----------------------------------------------------|---------------------------|
| Name                                                | Sequence                  |
| <i>hRBI</i> _Forward                                | TTGGATCACAGCGATACAAACTT   |
| <i>hRBI</i> _Reverse                                | AGCGCACGCCAATAAAGACAT     |
| <i>hE2F1</i> _Forward                               | ACGTGACGTGTCAGGACCT       |
| <i>hE2F1</i> _Reverse                               | GATCGGGCCTTGTTTGCTCTT     |
| <i>hCCNA2</i> _Forward                              | CGCTGGCGGTACTGAAGTC       |
| <i>hCCNA2</i> _Reverse                              | GAGGAACGGTGACATGCTCAT     |
| <i>hCCNE1</i> _Forward                              | GCCAGCCTTGGGACAATAATG     |
| <i>hCCNE1</i> _Reverse                              | CTTGCACGTTGAGTTTGGGT      |
| <i>hDHFR</i> _Forward                               | GCCACCGCTCAGGAATGAAT      |
| <i>hDHFR</i> _Reverse                               | GAGCTCCTTGTGGAGGTTCC      |
| <i>hTK1</i> _Forward                                | GCCAAAGACACTCGCTACAG      |
| <i>hTK1</i> _Reverse                                | CCCCTCGTCGATGCCTATG       |
| <i>hPCNA</i> _Forward                               | CCTGCTGGGATATTAGCTCCA     |
| <i>hPCNA</i> _Reverse                               | CAGCGGTAGGTGTCGAAGC       |
| <i>hCDC6</i> _Forward                               | ACCTATGCAACACTCCCCATT     |
| <i>hCDC6</i> _Reverse                               | TGGCTAGTTCTCTTTTGCTAGGA   |
| <i>hTP73</i> _Forward                               | GACGAGGACACGTACTACCTT     |
| <i>hTP73</i> _Reverse                               | CTGCCGATAGGAGTCCACCA      |
| <i>hCCND1</i> _Forward                              | GCTGCGAAGTGGAACCATC       |
| <i>hCCND1</i> _Reverse                              | CCTCCTTCTGCACACATTTGAA    |
| <i>hCDK4</i> _Forward                               | ATGGCTACCTCTCGATATGAGC    |
| <i>hCDK4</i> _Reverse                               | CATTGGGGACTCTCACACTCT     |
| <i>hCDK6</i> _Forward                               | TCTTCATTACACCGAGTAGTGC    |
| <i>hCDK6</i> _Reverse                               | TGAGGTTAGAGCCATCTGGAAA    |
| <i>hCCNB1</i> _Forward                              | AATAAGGCGAAGATCAACATGGC   |
| <i>hCCNB1</i> _Reverse                              | TTTGTTACCAATGTCCCCAAGAG   |
| <i>hACTN1</i> _Forward                              | GCTCGTCGTCGACAACGGCTC     |
| <i>hACTN1</i> _Reverse                              | CAAACATGATCTGGGTCATCTTCTC |
| <i>hCDK6</i> -ChIP-F                                | CTCATTCTCTCCGGAAGGC       |
| <i>hCDK6</i> -ChIP-R                                | GCAGCTGGGGCGACCGTGCG      |
